# Supplementary material
Source: PubMed Central journal article supplement (PMC7446562)
Supplement: 874770_Supplemental_Material.pdf [file 874770_Supplemental_Material.pdf]

Supplementary Table 1. Test-retest statistics for  $^{11}\text{C}$ -raclopride  $\text{BP}_{\text{ND}}$  measurements in left and right hemispheres performed approximately 7 months apart.

|                      | <b>Baseline</b><br>Mean (SD) | CV (%) | <b>Follow-up</b><br>Mean (SD) | CV (%) | <b>VAR (%)</b><br>mean (SD) | <b>min; max</b> | <b>ICC</b> | <b>r</b> |
|----------------------|------------------------------|--------|-------------------------------|--------|-----------------------------|-----------------|------------|----------|
| <b>Caudate</b>       |                              |        |                               |        |                             |                 |            |          |
| left                 | 2.220 (0.347)                | 15.6   | 2.170 (0.300)                 | 13.8   | 7.3 (6.2)                   | 0.5; 26.0       | 0.89       | 0.79     |
| right                | 2.332 (0.316)                | 13.6   | 2.259 (0.309)                 | 13.7   | 5.6 (4.3)                   | 0.0; 13.4       | 0.89       | 0.78     |
| <b>Putamen</b>       |                              |        |                               |        |                             |                 |            |          |
| left                 | 3.399 (0.357)                | 10.5   | 3.330 (0.323)                 | 9.7    | 3.9 (3.9)                   | 0.0; 17.1       | 0.91       | 0.82     |
| right                | 3.368 (0.336)                | 10.0   | 3.322 (0.279)                 | 8.4    | 4.8 (3.4)                   | 0.3; 12.1       | 0.89       | 0.77     |
| <b>Hippocampus</b>   |                              |        |                               |        |                             |                 |            |          |
| left                 | 0.271 (0.054)                | 19.9   | 0.273 (0.046)                 | 16.8   | 9.1 (5.8)                   | 3.2; 25.0       | 0.91       | 0.84     |
| right                | 0.264 (0.057)                | 21.6   | 0.256 (0.057)                 | 22.3   | 9.0 (7.4)                   | 0.0; 25.3       | 0.95       | 0.91     |
| <b>Amygdala</b>      |                              |        |                               |        |                             |                 |            |          |
| left                 | 0.413 (0.059)                | 14.3   | 0.412 (0.062)                 | 15.0   | 11.1 (9.4)                  | 0.0; 30.5       | 0.64       | 0.44     |
| right                | 0.373 (0.066)                | 17.7   | 0.375 (0.063)                 | 16.8   | 8.2 (6.3)                   | 0.0; 21.8       | 0.91       | 0.82     |
| <b>Pallidus</b>      |                              |        |                               |        |                             |                 |            |          |
| left                 | 1.377 (0.183)                | 13.3   | 1.355 (0.189)                 | 13.9   | 9.4 (7.4)                   | 0.0; 28.7       | 0.75       | 0.54     |
| right                | 1.391 (0.174)                | 12.5   | 1.350 (0.155)                 | 11.5   | 10.6 (8.7)                  | 1.4; 37.4       | 0.51       | 0.42     |
| <b>Thalamus</b>      |                              |        |                               |        |                             |                 |            |          |
| left                 | 0.490 (0.063)                | 12.9   | 0.490 (0.053)                 | 10.8   | 5.2 (4.1)                   | 0.0; 12.9       | 0.92       | 0.85     |
| right                | 0.483 (0.058)                | 12.0   | 0.483 (0.060)                 | 12.4   | 5.9 (4.2)                   | 0.0; 14.0       | 0.91       | 0.85     |
| <b>Orbitofrontal</b> |                              |        |                               |        |                             |                 |            |          |
| left                 | 0.237 (0.046)                | 19.4   | 0.249 (0.044)*                | 17.7   | 7.8 (7.8)                   | 0.0; 34.2       | 0.90       | 0.85     |
| right                | 0.260 (0.048)                | 18.5   | 0.261 (0.047)                 | 18.0   | 7.2 (5.5)                   | 0.0; 18.5       | 0.92       | 0.86     |
| <b>ACC</b>           |                              |        |                               |        |                             |                 |            |          |
| left                 | 0.245 (0.046)                | 18.8   | 0.252 (0.038)                 | 15.1   | 8.6 (5.8)                   | 0.0; 18.2       | 0.91       | 0.84     |
| right                | 0.268 (0.055)                | 20.5   | 0.269 (0.047)                 | 17.5   | 7.9 (6.6)                   | 0.0; 24.8       | 0.93       | 0.86     |
| <b>Sup. Frontal</b>  |                              |        |                               |        |                             |                 |            |          |
| left                 | 0.189 (0.044)                | 23.3   | 0.191 (0.037)                 | 19.4   | 8.4 (6.9)                   | 0.0; 26.8       | 0.93       | 0.89     |
| right                | 0.197 (0.047)                | 23.9   | 0.194 (0.038)                 | 19.6   | 8.6 (5.5)                   | 0.0; 19.1       | 0.93       | 0.86     |
| <b>Mid. Frontal</b>  |                              |        |                               |        |                             |                 |            |          |
| left                 | 0.219 (0.044)                | 20.1   | 0.222 (0.041)                 | 18.5   | 6.7 (5.5)                   | 0.0; 19.5       | 0.95       | 0.90     |
| right                | 0.235 (0.043)                | 18.3   | 0.229 (0.038)                 | 16.6   | 7.1 (4.3)                   | 0.0; 16.0       | 0.94       | 0.89     |
| <b>Inf. Frontal</b>  |                              |        |                               |        |                             |                 |            |          |
| left                 | 0.196 (0.054)                | 27.6   | 0.193 (0.051)                 | 26.4   | 11.1 (9.4)                  | 0.0; 43.8       | 0.94       | 0.90     |
| right                | 0.221 (0.052)                | 23.5   | 0.221 (0.054)                 | 24.4   | 8.4 (8.4)                   | 0.0; 38.2       | 0.94       | 0.90     |
| <b>Temporal</b>      |                              |        |                               |        |                             |                 |            |          |
| left                 | 0.270 (0.040)                | 14.8   | 0.279 (0.043)*                | 15.4   | 6.6 (4.7)                   | 0.0; 15.8       | 0.93       | 0.89     |
| right                | 0.283 (0.039)                | 13.8   | 0.284 (0.036)                 | 12.7   | 6.3 (4.3)                   | 0.0; 20.4       | 0.92       | 0.85     |

Note: \* $p < 0.05$  for comparisons of mean values between sessions. CV: coefficient of variance, VAR: absolute variability; min: minimum; max: maximum; ICC: intraclass correlation coefficient;  $r$ : Pearson's correlations coefficient (adjusted for grey-matter volume).
